# Supplementary material
Source: MDPI journal article supplement (https://www.mdpi.com/2073-4352/8/10/381)
Supplement: s1 [file s1]

## Supplementary data

Qiaoling Chen<sup>a</sup>, Min Luo<sup>b,\*</sup>, Chensheng Lin<sup>b</sup>

<sup>a</sup> School of Mathematics and Physics, Fujian University of Technology, Fuzhou  
350118, China

<sup>b</sup> Key Laboratory of Optoelectronic Materials Chemistry and Physics, Fujian Institute  
of Research on the Structure of Matter, Chinese Academy of Sciences, Fuzhou, Fujian,  
350002, P. R. China

Corresponding author:

Min Luo, E-mail: [lm8901@fjirsm.ac.cn](mailto:lm8901@fjirsm.ac.cn)

Fax: (+86)-591-83750713; Tel: (+86)-591-83776076

Table S1. Atomic coordinates and equivalent isotropic displacement parameters.  $U(\text{eq})$  is defined as one third of the trace of the orthogonalized  $U_{ij}$  tensor.

| atom  | x        | y        | z        | $U_{\text{eq}}(\text{\AA}^2)$ |
|-------|----------|----------|----------|-------------------------------|
| Yb(1) | 6634(1)  | -2962(1) | 8402(1)  | 10(1)                         |
| Yb(2) | 4063(1)  | -4806(1) | 9489(1)  | 8(1)                          |
| F(1)  | 2301(3)  | -4999(2) | 10442(2) | 13(1)                         |
| F(2)  | 2402(4)  | -4962(2) | 8087(2)  | 13(1)                         |
| O(1)  | 6032(5)  | -4972(2) | 8569(3)  | 19(1)                         |
| O(2)  | 6105(4)  | -4886(2) | 10834(3) | 14(1)                         |
| O(3)  | 8279(5)  | -4123(2) | 8738(3)  | 20(1)                         |
| O(4)  | 5108(4)  | -3380(2) | 9547(2)  | 11(1)                         |
| O(5)  | 4824(4)  | -3583(2) | 7153(2)  | 13(1)                         |
| O(6)  | 8629(5)  | -5500(2) | 8777(3)  | 19(1)                         |
| O(7)  | 8741(4)  | -2552(2) | 9899(2)  | 14(1)                         |
| O(8)  | 3459(4)  | -2319(2) | 9899(3)  | 15(1)                         |
| O(9)  | 12356(4) | -3561(2) | 9333(3)  | 13(1)                         |
| O(10) | 3859(4)  | -2424(2) | 7717(2)  | 13(1)                         |
| O(11) | 4490(4)  | -3521(2) | 11954(3) | 17(1)                         |
| O(12) | 6848(4)  | -1664(2) | 9082(2)  | 13(1)                         |
| O(13) | 8634(4)  | -4289(2) | 11275(3) | 16(1)                         |
| O(14) | 4081(4)  | -2416(2) | 12870(3) | 19(1)                         |
| O(15) | 8419(4)  | -5676(2) | 11313(3) | 19(1)                         |
| O(16) | 9507(4)  | -1227(2) | 9645(2)  | 14(1)                         |
| O(17) | 2091(4)  | -3229(2) | 6646(2)  | 15(1)                         |
| O(18) | 1873(4)  | -2994(2) | 11922(3) | 21(1)                         |
| C(1)  | 7661(6)  | -4879(3) | 8695(4)  | 12(1)                         |
| C(2)  | 3541(6)  | -3080(3) | 7154(3)  | 9(1)                          |
| C(3)  | 8392(6)  | -1799(3) | 9563(3)  | 10(1)                         |
| C(4)  | 7747(6)  | -4958(3) | 11138(3) | 8(1)                          |
| C(5)  | 3503(6)  | -2998(3) | 12223(3) | 11(1)                         |
| C(6)  | 3592(6)  | -3056(3) | 9591(4)  | 10(1)                         |
| Na(1) | 4125(4)  | -5010(2) | 6946(2)  | 10(1)                         |
| Na(2) | 6701(3)  | -3192(2) | 11126(2) | 17(1)                         |
| Na(3) | 6499(3)  | -3246(2) | 5899(2)  | 17(1)                         |
| Na(4) | 5338(3)  | -1092(1) | 10278(2) | 15(1)                         |
| Na(5) | 5370(2)  | -982(1)  | 7738(1)  | 14(1)                         |
| Na(6) | 10445(2) | -3869(1) | 7752(2)  | 15(1)                         |
| Na(7) | 10446(3) | -3791(1) | 10339(2) | 18(1)                         |

|       |         |          |         |       |
|-------|---------|----------|---------|-------|
| Na(8) | 6621(3) | -6666(1) | 8504(2) | 18(1) |
|-------|---------|----------|---------|-------|

Table S2. Bond lengths (Å) for Na<sub>4</sub>Yb(CO<sub>3</sub>)<sub>3</sub>F

|               |          |               |          |
|---------------|----------|---------------|----------|
| Yb(1)-O(5)    | 2.262(3) | O(3)-C(1)     | 1.300(5) |
| Yb(1)-O(3)    | 2.266(3) | O(4)-C(6)     | 1.333(5) |
| Yb(1)-O(12)   | 2.267(3) | O(5)-C(2)     | 1.304(5) |
| Yb(1)-O(4)    | 2.294(3) | O(6)-C(1)     | 1.248(6) |
| Yb(1)-O(14)#1 | 2.311(3) | O(7)-C(3)     | 1.298(5) |
| Yb(1)-O(10)   | 2.399(3) | O(8)-C(6)     | 1.262(5) |
| Yb(1)-O(7)    | 2.499(3) | O(9)-C(6)#4   | 1.273(5) |
| Yb(1)-O(18)#1 | 2.603(4) | O(9)-Yb(2)#4  | 2.394(3) |
| Yb(1)-C(3)    | 2.672(4) | O(10)-C(2)    | 1.302(5) |
| Yb(1)-C(2)    | 2.740(5) | O(11)-C(5)    | 1.256(6) |
| Yb(1)-C(5)#1  | 2.875(5) | O(12)-C(3)    | 1.304(5) |
| Yb(1)-Na(5)   | 3.386(2) | O(13)-C(4)    | 1.275(5) |
| Yb(2)-F(1)    | 2.145(3) | O(14)-C(5)    | 1.312(5) |
| Yb(2)-F(2)    | 2.151(3) | O(14)-Yb(1)#5 | 2.311(3) |
| Yb(2)-O(2)    | 2.236(4) | O(15)-C(4)    | 1.267(5) |
| Yb(2)-O(1)    | 2.239(4) | O(16)-C(3)    | 1.266(5) |
| Yb(2)-O(16)#2 | 2.295(3) | O(16)-Yb(2)#6 | 2.295(3) |
| Yb(2)-O(9)#3  | 2.394(3) | O(17)-C(2)    | 1.258(5) |
| Yb(2)-O(4)    | 2.418(3) | O(18)-C(5)    | 1.291(6) |
| Yb(2)-C(6)    | 2.821(4) | O(18)-Yb(1)#5 | 2.603(4) |
| O(1)-C(1)     | 1.292(6) | C(5)-Yb(1)#5  | 2.875(5) |
| O(2)-C(4)     | 1.306(6) | C(6)-O(9)#3   | 1.273(5) |

Symmetry transformations used to generate equivalent atoms:

#1  $x+1/2, -y-1/2, z-1/2$       #2  $x-1/2, y-1/2, z$   
#3  $x-1, y, z$       #4  $x+1, y, z$       #5  $x-1/2, -y-1/2, z+1/2$   
#6  $x+1/2, y+1/2, z$

**Table S3. The values of geometrical factor**

| crystals                                            | $g_{111}$ | $g_{112}$ | $g_{113}$ | $g_{311}$ | $g_{322}$ | $g_{333}$ |
|-----------------------------------------------------|-----------|-----------|-----------|-----------|-----------|-----------|
| Na <sub>4</sub> Yb(CO <sub>3</sub> ) <sub>3</sub> F | -20.7319  | 3.40426   | -1.34299  | -9.82346  | 3.9896    | 1.12835   |

**Table S4. NLO effects of Na<sub>4</sub>Yb(CO<sub>3</sub>)<sub>3</sub>F**

| Crystals                                            | SHG coefficient(visible) ( $\times$ KDP) | Structural criterion C | densities of the [CO <sub>3</sub> ] (n/V) ( $\text{\AA}^{-3}$ ) | (n/V) $\times$ C( $\text{\AA}^{-3}$ ) |
|-----------------------------------------------------|------------------------------------------|------------------------|-----------------------------------------------------------------|---------------------------------------|
| Na <sub>4</sub> Yb(CO <sub>3</sub> ) <sub>3</sub> F | 4.3                                      | 0.864                  | 0.0137                                                          | 0.0118                                |

## The Anionic Group Theory Calculation.

The macroscopic second-order susceptibility  $\chi^{(2)}$  could be expressed by Eq. 3 according to the anionic group theory.

$$\chi_{ijk}^{(2)} = \frac{F}{V} \sum_p \sum_{i'j'k'} \alpha_{ii'} \alpha_{jj'} \alpha_{kk'} \beta_{ij'k'}^{(2)}(P), \quad (1)$$

where  $F$  is the correction factor of the localized field,  $V$  is the volume of the unit cell,  $\alpha_{ii'}$ ,  $\alpha_{jj'}$ , and  $\alpha_{kk'}$  are the direction cosines between the macroscopic coordinates axes of the crystal and the microscopic coordinates axes of  $[\text{CO}_3]$  or  $[\text{BO}_3]$  groups, and  $\beta_{ij'k'}^{(2)}$  is the microscopic second-order susceptibility tensors of an individual group, which can be calculated with quantum chemistry method. Because  $[\text{CO}_3]$  and  $[\text{BO}_3]$  is a planar group in point group  $D_{3h}$ , in the Kleinman approximation, there

are only two nonvanishing second-order susceptibility  $\beta_{111}^{(2)} = -\beta_{122}^{(2)}$ . The geometrical factor,  $g$ , could be derived from Eq. (1). and Eq. (2) could be simplified according to the deduction process<sup>44</sup>:

$$\chi_{ijk}^{(2)} = \frac{F}{V} \cdot g_{ijk} \cdot \beta_{111}^{(2)} \quad (2)$$

$$g = \max(g_{ijk}); (i, j, k = 1, 2, 3) \quad (3)$$

In case of unspontaneous polarization, the structural criterion  $C$  is defined as:

$$C = \frac{g}{n} \quad (4)$$

where  $n$  is the number of anionic groups in a unit cell.
